# Supplementary material
Source: Research Square preprint supplement (doi:10.21203/rs.3.rs-9432114/v1)
Supplement: Supplementary file 3 [file d8a7f72a8622e190d5056142.docx]

**Figure 4.**

*Network of Argentina and Spain*
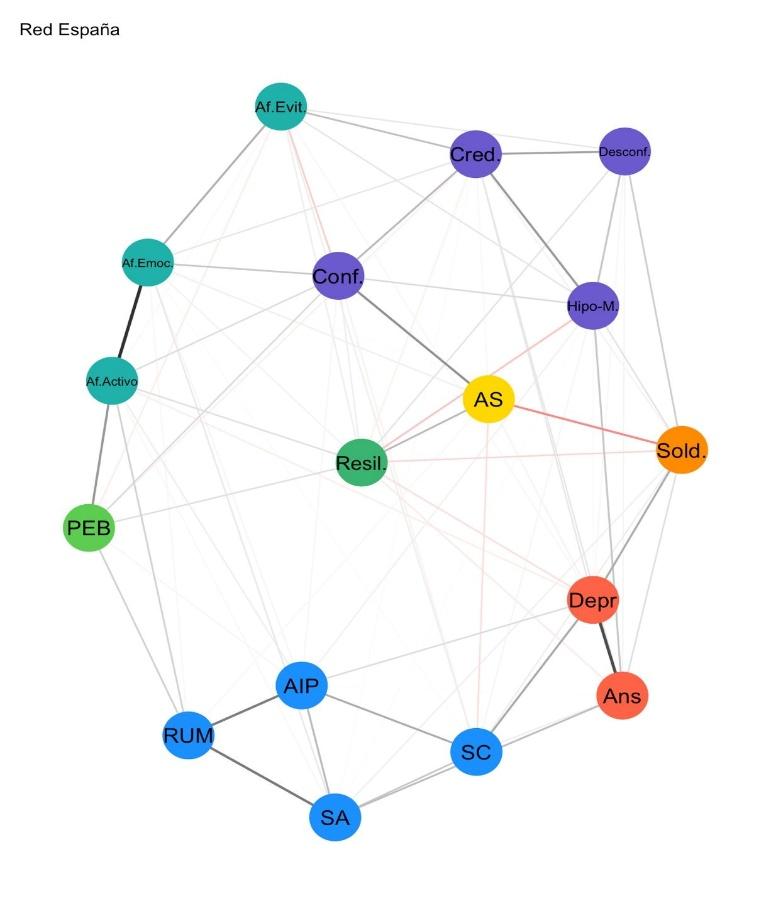


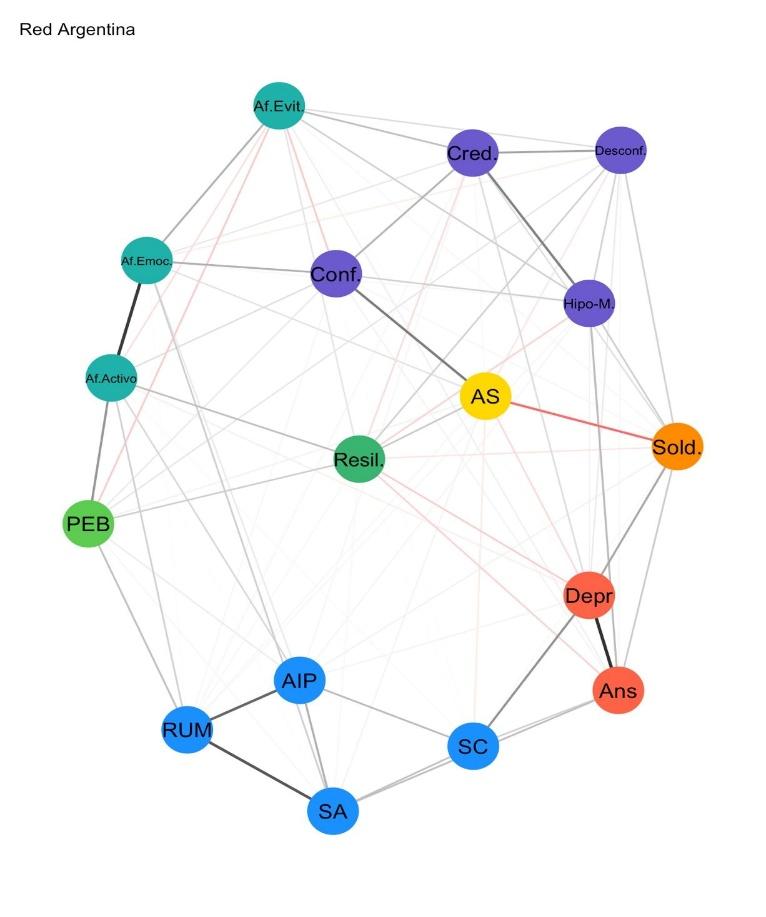


*Note: the figure on the left corresponds to Argentina, and the figure on the right to Spain.*
