# Supplementary material
Source: Research Square preprint supplement (doi:10.21203/rs.3.rs-9432114/v1)
Supplement: Supplementary file 4 [file d8f60d7bb98907b910d07db3.docx]

**Table S1**

*Exploratory edge-wise differences between Argentina and Spain (uncorrected NCT results)*

| Edge (Var1 – Var2) | *p* | Test statistic | Weight Argentina | Weight Spain | Difference |
| --- | --- | --- | --- | --- | --- |
| Credulity-Affective symptoms | .008 | .012 | 0 | .012 | -.012 |
| Hypo-M-Behavioral symptoms | .018 | .024 | 0 | .024 | -.024 |
| Behavioral symptoms-Anxiety about personal impact | .037 | .068 | .157 | .225 | -.069 |
| Credulity-Anxiety | .006 | .063 | 0 | .063 | -.063 |
| Anxiety about personal impact-Depression | .006 | .072 | .023 | .095 | -.072 |
| Trust-Resilience | .015 | .045 | 0 | .045 | -.045 |
| Affective symptoms-Social support | .033 | .024 | .024 | 0 | .024 |
| Affective symptoms-Loneliness | .031 | .038 | 0 | .039 | -.039 |
| Rumination-Loneliness | .022 | .004 | .005 | 0 | .005 |
| Hypo-M-Active Adaptive | .013 | .002 | 0 | .003 | -0.003 |
| Behavioral symptoms-Active Adaptive | .017 | .012 | -.013 | 0 | -.013 |
| Resilience-Active Adaptive | .022 | .059 | .146 | .086 | .06 |
| Anxiety-Avoidant Maladaptive | .034 | .033 | .034 | 0 | .034 |
| Resilience-Emotional Neutral | .00049 | .036 | -.006 | .031 | -.036 |
| Active Adaptive-Emotional Neutral | .00099 | .098 | .464 | .562 | -.098 |
| Mistrust-PEB | .015 | .053 | .054 | 0 | .054 |
| Avoidant Maladaptive-PEB | .048 | .061 | -.103 | -.042 | -.061 |

*Note:* Var = variable; Hypo-M = hypomentalization; PEB = Pro Environmental Behaviour.
