# Supplementary material
Source: Research Square preprint supplement (doi:10.21203/rs.3.rs-9432114/v1)

***Figure 2.***

*Edge weight estimates*

*
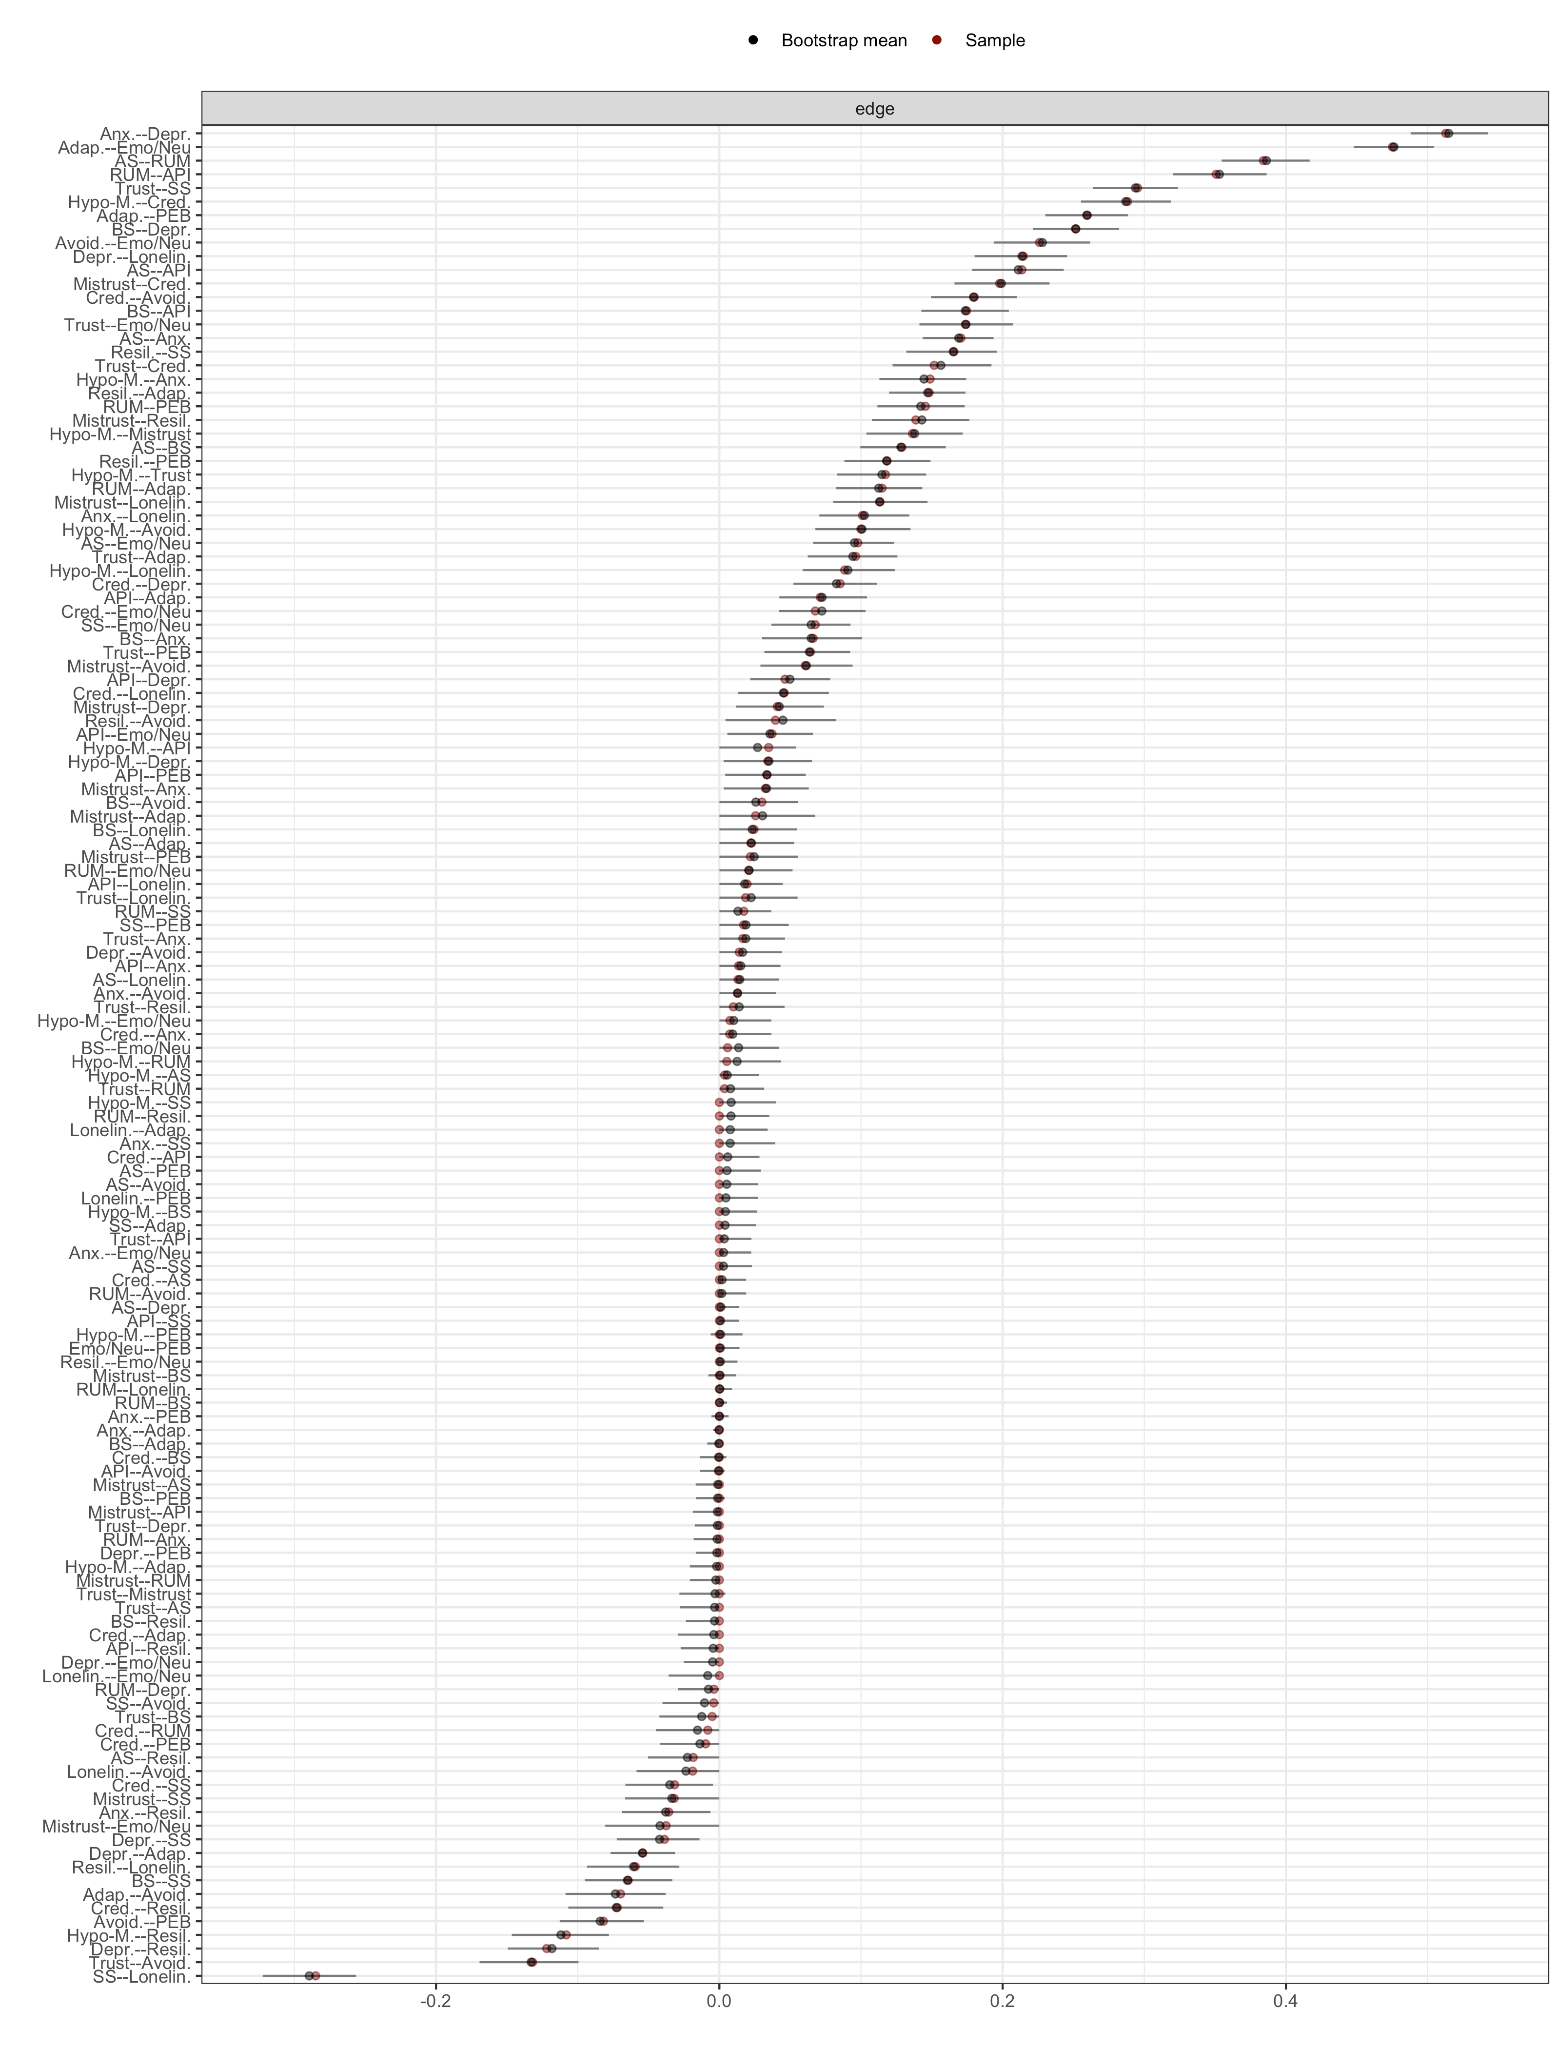
*

Supplement: Supplementary file 2 [file d72ea877c3767278d26bebb6.docx]
